# Supplementary material for: Using deep learning-based natural language processing to identify reasons for statin nonuse in patients with atherosclerotic cardiovascular disease
Source: PubMed Central journal article supplement (PMC9287295; doi:10.1038/s43856-022-00157-w), 2022-07-15
Supplement: 43856_2022_157_MOESM1_ESM.pdf [file 43856_2022_157_MOESM1_ESM.pdf]

## SUPPLEMENTARY INFORMATION

### **Using Deep Learning-based Natural Language Processing to Identify Reasons for Statin Nonuse in Patients with Atherosclerotic Cardiovascular Disease**

Ashish Sarraju<sup>1\*</sup>, Jean Coquet<sup>2,3\*</sup>, Alban Zammit<sup>2,3</sup>, Antonia Chan<sup>2</sup>, Summer Ngo<sup>1</sup>, Tina Hernandez-Boussard<sup>2,3,4\*\*</sup>, Fatima Rodriguez<sup>1\*\*</sup>

<sup>1</sup>Division of Cardiovascular Medicine and Cardiovascular Institute, Stanford University, Stanford, CA, USA

<sup>2</sup>Department of Medicine, Stanford University, Stanford, CA, USA

<sup>3</sup>Department of Biomedical Data Science, Stanford University, Stanford, CA, USA

<sup>4</sup>Department of Surgery, Stanford University School of Medicine, Stanford, CA, USA

\* These authors contributed equally

\*\* These authors jointly supervised this work

**Supplementary Table 1. ICD codes of ASCVD diagnoses.**

| <b>Condition</b>            | <b>ICD 9 codes</b>                             | <b>ICD 10 codes</b>                                                                                                                                                                                                                                                                                       |
|-----------------------------|------------------------------------------------|-----------------------------------------------------------------------------------------------------------------------------------------------------------------------------------------------------------------------------------------------------------------------------------------------------------|
| Coronary Artery Disease     | 410.*, 411.*,<br>412.*, 413.*,<br>414.*        | I22.8, I22.1, I21.4, I21.11, I22.2, I21.A1, I21.9, I23.3,<br>I22.0, I21.A9, I21.3, I21.02, I21.01, I21.21, I22.9, I21.29,<br>I21.19, Z95.5, I20.*, I23.7, I24.*, I25.*, T82.85, I70.*,<br>Z98.61                                                                                                          |
| Cerebrovascular Disease     | 433.*, 434.*,<br>435.*, 436.*,<br>437.*, 438.* | I63.031, I65.09, I63.00, I63.02, I63.032, I65.01, I65.01,<br>I63.012, I63.09, I63.039, I65.02, I63.033, I65.03,<br>I63.011, I63.019, I63.013, I66.03, I66.09, I67.89, I66.01,<br>I66.02, I67.858, I67.2, I67.82, I67.81, G45.*, G46.*, I63.*,<br>I67.85, I67.8, I67.9, I69.30, I65.*, I66.*, I68.*, I68.8 |
| Peripheral vascular disease | 440.*                                          | I70.*, I73.9, I73.8, I74.4, I75.011, I75.012, I75.013,<br>I75.019, I75.021, I75.022, I75.023, I75.029, I75.89                                                                                                                                                                                             |

**Supplementary Table 2. RxNorm codes for statin medications**

| <b>Medication name</b> | <b>RxCUI codes</b> |
|------------------------|--------------------|
| Lovastatin             | 6472               |
| Pitavastatin           | 861634             |
| Fluvastatin            | 41127              |
| Rosuvastatin           | 301542             |
| Pravastatin            | 42463              |
| Atorvastatin           | 83367              |
| Simvastatin            | 36567              |

**Supplementary Table 3. Statin term dictionary.**

|              |
|--------------|
| Statin       |
| Atorvastatin |
| Fluvastatin  |
| Lovastatin   |
| Pitavastatin |
| Pravastatin  |
| Rosuvastatin |
| Simvastatin  |
| Altacor      |
| Altoprev     |
| Crestor      |
| Juvisync     |
| Lescol       |
| Lipitor      |
| Livalo       |
| Mevacor      |
| Pravachol    |
| Zocor        |

**Supplementary Table 4. Predictors of statin use (versus no statin use) among patients with ASCVD diagnoses.**

| Variables                                                          |                                    | Unadjusted         |        | Adjusted           |        |
|--------------------------------------------------------------------|------------------------------------|--------------------|--------|--------------------|--------|
|                                                                    |                                    | OR (95% CI)        | p      | OR (95% CI)        | p      |
| <b>Age*</b><br>(N = 56,530)                                        |                                    | 1.19 (1.18 - 1.21) | <0.001 | 1.28 (1.26 - 1.31) | <0.001 |
| <b>Gender</b><br>(N = 34,291; Ref: Male)                           | Female<br>(N = 22,233)             | 0.67 (0.65 - 0.70) | <0.001 | 0.67 (0.64 - 0.70) | <0.001 |
| <b>Race/Ethnicity</b><br>(N = 32,117; Ref: Non-Hispanic White)     | Non-Hispanic Black<br>(N = 2,984)  | 0.89 (0.82 - 0.96) | 0.002  | 1.10 (1.01 - 1.21) | 0.033  |
|                                                                    | Hispanic<br>(N = 5,306)            | 1.01 (0.95 - 1.07) | 0.72   | 1.12 (1.05 - 1.21) | 0.001  |
|                                                                    | Non-Hispanic Asian<br>(N = 8,581)  | 1.25 (1.19 - 1.32) | <0.001 | 1.22 (1.15 - 1.29) | <0.001 |
|                                                                    | Other (N = 4,779)                  | 1.29 (1.21 - 1.37) | <0.001 | 1.20 (1.11 - 1.29) | <0.001 |
| <b>Provider Location</b><br>(N = 31,594; Ref: SHC)                 | UHA<br>(N = 22,005)                | 0.68 (0.66 - 0.71) | <0.001 | 0.70 (0.67 - 0.73) | <0.001 |
|                                                                    | ValleyCare<br>(N = 2,743)          | 0.71 (0.66 - 0.77) | <0.001 | 0.70 (0.64 - 0.77) | <0.001 |
| <b>Type of ASCVD</b><br>(N = 27,729; Ref: Coronary Artery Disease) | Cerebrovascular<br>(N = 12,639)    | 0.49 (0.47 - 0.51) | <0.001 | 0.54 (0.51 - 0.57) | <0.001 |
|                                                                    | Peripheral Arterial<br>(N = 6,189) | 0.38 (0.36 - 0.40) | <0.001 | 0.38 (0.35 - 0.40) | <0.001 |
|                                                                    | Polyvascular<br>(N = 9,973)        | 0.23 (0.22 - 0.24) | <0.001 | 0.24 (0.23 - 0.26) | <0.001 |
| <b>Insurance status</b><br>(N = 31,793; Ref: Medicare)             | Medicaid<br>(N = 3,673)            | 0.82 (0.76 - 0.87) | <0.001 | 1.00 (0.93 - 1.09) | 0.87   |
|                                                                    | Private<br>(N = 12,404)            | 0.75 (0.72 - 0.78) | <0.001 | 0.99 (0.94 - 1.05) | 0.735  |

**Supplementary Table 5. Predictors of high-intensity statin therapy (versus low or moderate intensity therapy) in patients with ASCVD diagnoses.**

| Variables                                                          |                                 | Unadjusted         |        | Adjusted           |        |
|--------------------------------------------------------------------|---------------------------------|--------------------|--------|--------------------|--------|
|                                                                    |                                 | OR (95% CI)        | p      | OR (95% CI)        | p      |
| <b>Age*</b><br>(N = 33,371)                                        |                                 | 0.79 (0.78 - 0.81) | <0.001 | 0.84 (0.82 - 0.87) | <0.001 |
| <b>Gender</b><br>(N = 21,518; Ref: Male)                           | Female (N = 11,852)             | 0.72 (0.68 - 0.75) | <0.001 | 0.77 (0.73 - 0.82) | <0.001 |
| <b>Race/Ethnicity</b><br>(N = 18,575; Ref: Non-Hispanic White)     | Non-Hispanic Black (N = 1,655)  | 1.29 (1.17 - 1.43) | <0.001 | 1.27 (1.13 - 1.43) | <0.001 |
|                                                                    | Hispanic (N = 3,094)            | 1.15 (1.07 - 1.24) | <0.001 | 1.02 (0.94 - 1.12) | 0.614  |
|                                                                    | Non-Hispanic Asian (N = 5,431)  | 0.88 (0.83 - 0.94) | <0.001 | 0.82 (0.76 - 0.88) | <0.001 |
|                                                                    | Other (N = 3,032)               | 1.22 (1.13 - 1.32) | <0.001 | 1.07 (0.98 - 1.17) | 0.118  |
| <b>Provider Location</b><br>(N = 19,765; Ref: SHC)                 | UHA (N = 12,055)                | 0.94 (0.90 - 0.99) | 0.009  | 0.96 (0.91 - 1.01) | 0.156  |
|                                                                    | ValleyCare (N = 1,537)          | 1.05 (0.95 - 1.17) | 0.352  | 1.07 (0.95 - 1.20) | 0.267  |
| <b>Type of ASCVD</b><br>(N = 19,709; Ref: Coronary Artery Disease) | Cerebrovascular (N = 6,919)     | 0.82 (0.77 - 0.86) | <0.001 | 0.87 (0.81 - 0.92) | <0.001 |
|                                                                    | Peripheral Arterial (N = 3,017) | 0.47 (0.43 - 0.51) | <0.001 | 0.53 (0.48 - 0.58) | <0.001 |
|                                                                    | Polyvascular (N = 3,726)        | 1.25 (1.17 - 1.34) | <0.001 | 1.34 (1.23 - 1.45) | <0.001 |
| <b>Insurance status</b><br>(N = 19,552; Ref: Medicare)             | Medicaid (N = 2,113)            | 1.97 (1.80 - 2.16) | <0.001 | 1.63 (1.48 - 1.81) | <0.001 |
|                                                                    | Private (N = 6,817)             | 1.61 (1.52 - 1.70) | <0.001 | 1.19 (1.11 - 1.27) | <0.001 |

**Supplementary Table 6. Characteristics of patients without structured statin prescriptions, stratified by NLP-identified use or nonuse of statins documented in clinical notes.**

|                                         |                     | Not using statins per NLP | Using statins per NLP | P-Value |
|-----------------------------------------|---------------------|---------------------------|-----------------------|---------|
| Number of patients, n (%)               |                     | 20762 (93.1)              | 1534 (6.8)            |         |
| Age, mean (SD)                          |                     | 65.4 (14.7)               | 68.1 (12.0)           | <0.001  |
| Gender, n (%)                           | Female              | 9416 (45.4)               | 569 (37.1)            | <0.001  |
|                                         | Male                | 11341 (54.6)              | 965 (62.9)            |         |
| Race/Ethnicity, n (%)                   | Hispanic/Latino     | 1997 (9.6)                | 127 (8.3)             | 0.011   |
|                                         | Missing             | 1074 (5.2)                | 75 (4.9)              |         |
|                                         | Non-Hispanic Asian  | 2834 (13.6)               | 229 (14.9)            |         |
|                                         | Non-Hispanic Black  | 1219 (5.9)                | 63 (4.1)              |         |
|                                         | Non-Hispanic White  | 12083 (58.2)              | 934 (60.9)            |         |
|                                         | Other               | 1555 (7.5)                | 106 (6.9)             |         |
| Provider Location, n (%)                | SHC                 | 10530 (50.7)              | 837 (54.6)            | <0.001  |
|                                         | UHA                 | 8987 (43.3)               | 614 (40.0)            |         |
|                                         | Valleycare          | 1077 (5.2)                | 83 (5.4)              |         |
| ASCVD type, n (%)                       | Cerebrovascular     | 5130 (24.7)               | 306 (19.9)            | <0.001  |
|                                         | Coronary artery     | 7193 (34.6)               | 688 (44.9)            |         |
|                                         | Peripheral Arterial | 2896 (13.9)               | 118 (7.7)             |         |
|                                         | Polyvascular        | 5543 (26.7)               | 422 (27.5)            |         |
| Current Smoking, n (%)                  |                     | 867 (4.2)                 | 71 (4.6)              | 0.432   |
| Hospitalizations in prior 1 year, n (%) |                     | 1758 (8.5)                | 156 (10.2)            | 0.025   |
| Insurance status, n (%)                 | Medicaid            | 1438 (6.9)                | 77 (5.0)              | <0.001  |
|                                         | Medicare            | 10870 (52.4)              | 918 (59.8)            |         |
|                                         | Other/missing       | 3397 (16.4)               | 216 (14.1)            |         |
|                                         | Private             | 5057 (24.4)               | 323 (21.1)            |         |
| Ezetimibe, n (%)                        |                     | 306 (1.5)                 | 226 (14.7)            | <0.001  |
| Chronic Kidney Disease, n (%)           |                     | 2109 (10.2)               | 212 (13.8)            | <0.001  |
| Heart Failure, n (%)                    |                     | 2780 (13.4)               | 244 (15.9)            | 0.013   |
| Atrial fibrillation, n (%)              |                     | 3175 (15.3)               | 283 (18.4)            | 0.004   |
| Liver disease, n (%)                    |                     | 1415 (6.8)                | 102 (6.6)             | 0.844   |
